# Supplementary material for: Endophytic fungal communities associated with field-grown soybean roots and seeds in the Huang-Huai region of China
Source: PeerJ. 2018 Apr 30;6:e4713. doi: 10.7717/peerj.4713 (PMC5933319; doi:10.7717/peerj.4713)
Supplement: Supplemental Information 1 — Table S1. The identified fungal genera using three different methods. Table S2. Endophytic fungal species isolated from healthy soybean roots (CD-iso). Table S3. Fungal genera identified from different cities. Table S4. Fungal genera identified from different tissues (roots and seeds). [file peerj-06-4713-s001.xlsx]

## Sheet: Table S1
Table S1. The identified fungal genera using three different methods
Data with yellow background are shown in Fig. 1B.
Column J:
- R1: de Souza Leite, T., A. Cnossen-Fassoni, et al. (2013). "Novel and highly diverse fungal endophytes in soybean revealed by the consortium of two different techniques." J Microbiol 51(1): 56-108.
- R2: Fernandes, E. G., Pereira, O. L., Da, S. C., Bento, C. B., & de Queiroz, M. V. (2015). Diversity of endophytic fungi in glycine max.Microbiological Research, 181, 84-92.
- R3: Impullitti, A. E. and D. K. Malvick (2013). "Fungal endophyte diversity in soybean." J Appl Microbiol 114(5): 1500-1506.
- R4: Pimentel, I. C., Glienke-Blanco, C., Gabardo, J., Stuart, R. M., & Azevedo, J. L. (2006). Identification and colonization of endophytic fungi from soybean (glycine max (l.) merril) under different environmental conditions. Brazilian Archives of Biology & Technology, 49(5), 705-711.
- R5: Hamayun, M., S. A. Khan, et al. (2009). "Cladosporium sphaerospermum as a new plant growth-promoting endophyte from the roots of Glycine max (L.) Merr." World Journal of Microbiology & Biotechnology 25(4): 627-632.
Genus name	Group	CI-seq (OTU abundance)	CI-seq (%)	CD-seq (OTU abundance)	CD-seq (%)	CD-iso (Number of isolates)	CD-iso (%)		Reported*
Fusarium (Haematonectria, Gibberella)	Y-Y-Y	348367	62.1977	464862	67.7496	54	39.7059	:	R1, R2, R3, R4
Macrophomina	Y-Y-Y	15985	2.85398	3509	0.511406	6	4.41176	:	R2
Alternaria	Y-Y-Y	1986	0.354582	7952	1.15894	5	3.67647	:	R1, R2, R3, R4
Trichoderma	Y-Y-Y	220	0.039279	37066	5.40205	23	16.9118	:	R3
Colletotrichum	Y-Y-Y	156	0.0278524	16	0.00233186	1	0.735294	:	R1, R2, R4
Aspergillus	Y-Y-Y	69	0.0123193	3304	0.481529	4	2.94118	:	R4
Penicillium	Y-Y-Y	34	0.00607039	577	0.0840928	5	3.67647	:	R4
Rhizoctonia (Ceratobasidium)	Y-Y-Y	65652	11.7216	19660	2.86528	4	2.94118	:
Clonostachys	Y-Y-Y	32492	5.80115	97746	14.2456	5	3.67647	:
Calonectria	Y-Y-Y	13117	2.34192	20050	2.92211	3	2.20588	:
Meyerozyma	Y-Y-Y	164	0.0292807	16711	2.43548	3	2.20588	:
Simplicillium	Y-Y-Y	22	0.0039279	2438	0.355317	1	0.735294	:
Phoma	Y-Y-o	41203	7.35642	51	0.00743281	-	-	:	R1, R2, R3
Cladosporium	Y-Y-o	736	0.131406	3919	0.57116	-	-	:	R1, R2, R3, R4, R5
Mortierella	Y-Y-o	13936	2.48814	6019	0.877217	-	-	:
Ilyonectria	Y-Y-o	9200	1.64258	107	0.0155943	-	-	:
Podospora	Y-Y-o	1974	0.35244	8	0.00116593	-	-	:
Preussia	Y-Y-o	1555	0.277631	8	0.00116593	-	-	:
Corynespora	Y-Y-o	1298	0.231746	223	0.0325003	-	-	:
Microdochium	Y-Y-o	585	0.104446	5	0.000728707	-	-	:
Cochliobolus	Y-Y-o	541	0.0965906	10	0.00145741	-	-	:	R1, R2
Psathyrella	Y-Y-o	471	0.0840927	6	0.000874448	-	-	:
Metacordyceps	Y-Y-o	321	0.0573116	2	0.000291483	-	-	:
Dokmaia	Y-Y-o	274	0.0489202	5	0.000728707	-	-	:
Mycoleptodiscus	Y-Y-o	264	0.0471348	98	0.0142827	-	-	:
Thanatephorus	Y-Y-o	231	0.0412429	17	0.0024776	-	-	:
Fusicolla	Y-Y-o	230	0.0410644	19	0.00276909	-	-	:
Schizothecium	Y-Y-o	183	0.032673	8	0.00116593	-	-	:
Humicola	Y-Y-o	157	0.0280309	246	0.0358524	-	-	:
Myrothecium	Y-Y-o	125	0.0223176	88	0.0128252	-	-	:	R1, R2
Guehomyces	Y-Y-o	100	0.0178541	3	0.000437224	-	-	:
Cryptococcus	Y-Y-o	74	0.013212	6	0.000874448	-	-	:
Neurospora	Y-Y-o	72	0.0128549	140	0.0204038	-	-	:
Phaeoacremonium	Y-Y-o	29	0.00517768	143	0.020841	-	-	:
Davidiella	Y-Y-o	29	0.00517768	15	0.00218612	-	-	:	R1
Stachybotrys	Y-Y-o	26	0.00464206	5	0.000728707	-	-	:
Phaeosphaeria	Y-Y-o	20	0.00357082	2	0.000291483	-	-	:
Drechslera	Y-Y-o	15	0.00267811	2	0.000291483	-	-	:	R4
Pseudaleuria	Y-Y-o	11	0.00196395	13	0.00189464	-	-	:
Verticillium	Y-Y-o	10	0.00178541	25	0.00364353	-	-	:	R3
Waitea	Y-Y-o	7	0.00124979	6	0.000874448	-	-	:
Acremonium	Y-o-Y	568	0.101411	-	-	1	0.735294	:	R4
Cercophora	Y-o-o	1888	0.337085	-	-	-	-	:
Engyodontium	Y-o-o	1597	0.28513	-	-	-	-	:
Psilocybe	Y-o-o	880	0.157116	-	-	-	-	:
Glomus	Y-o-o	839	0.149796	-	-	-	-	:
Zopfiella	Y-o-o	667	0.119087	-	-	-	-	:
Exophiala	Y-o-o	187	0.0333871	-	-	-	-	:
Coprinopsis	Y-o-o	157	0.0280309	-	-	-	-	:
Cladorrhinum	Y-o-o	139	0.0248172	-	-	-	-	:
Myrmecridium	Y-o-o	101	0.0180326	-	-	-	-	:
Rhodotorula	Y-o-o	91	0.0162472	-	-	-	-	:	R1
Candida	Y-o-o	83	0.0148189	-	-	-	-	:
Leptosphaeria	Y-o-o	81	0.0144618	-	-	-	-	:	R2
Paraphoma	Y-o-o	59	0.0105339	-	-	-	-	:
Bjerkandera	Y-o-o	48	0.00856996	-	-	-	-	:
Emericella	Y-o-o	48	0.00856996	-	-	-	-	:
Panaeolus	Y-o-o	46	0.00821288	-	-	-	-	:
Phaeosphaeriopsis	Y-o-o	42	0.00749871	-	-	-	-	:	R1
Pyrenochaetopsis	Y-o-o	41	0.00732017	-	-	-	-	:
Cladophialophora	Y-o-o	37	0.00660601	-	-	-	-	:
Rhodosporidium	Y-o-o	37	0.00660601	-	-	-	-	:
Erythrobasidium	Y-o-o	36	0.00642747	-	-	-	-	:
Sporobolomyces	Y-o-o	35	0.00624893	-	-	-	-	:	R1
Scytalidium	Y-o-o	34	0.00607039	-	-	-	-	:
Torula	Y-o-o	33	0.00589185	-	-	-	-	:
Capnobotryella	Y-o-o	30	0.00535622	-	-	-	-	:
Tetracladium	Y-o-o	25	0.00446352	-	-	-	-	:
Codinaeopsis	Y-o-o	22	0.0039279	-	-	-	-	:
Trametes	Y-o-o	21	0.00374936	-	-	-	-	:
Leptosphaerulina	Y-o-o	20	0.00357082	-	-	-	-	:
Crinipellis	Y-o-o	19	0.00339228	-	-	-	-	:
Nigrospora	Y-o-o	19	0.00339228	-	-	-	-	:	R1, R2
Coniochaeta	Y-o-o	18	0.00321373	-	-	-	-	:
Sarocladium	Y-o-o	17	0.00303519	-	-	-	-	:
Volutella	Y-o-o	17	0.00303519	-	-	-	-	:
Thelonectria	Y-o-o	14	0.00249957	-	-	-	-	:
Chaetosphaeronema	Y-o-o	13	0.00232103	-	-	-	-	:
Drechslerella	Y-o-o	11	0.00196395	-	-	-	-	:
Exserohilum	Y-o-o	10	0.00178541	-	-	-	-	:
Mrakia	Y-o-o	10	0.00178541	-	-	-	-	:
Periconia	Y-o-o	10	0.00178541	-	-	-	-	:
Apodus	Y-o-o	9	0.00160687	-	-	-	-	:
Cyphellophora	Y-o-o	9	0.00160687	-	-	-	-	:
Arthrobotrys	Y-o-o	7	0.00124979	-	-	-	-	:
Minimedusa	Y-o-o	7	0.00124979	-	-	-	-	:
Entoloma	Y-o-o	6	0.00107124	-	-	-	-	:
Filobasidium	Y-o-o	6	0.00107124	-	-	-	-	:
Peziza	Y-o-o	6	0.00107124	-	-	-	-	:
Piriformospora	Y-o-o	6	0.00107124	-	-	-	-	:
Rhizophlyctis	Y-o-o	6	0.00107124	-	-	-	-	:
Chloridium	Y-o-o	5	0.000892704	-	-	-	-	:
Devriesia	Y-o-o	5	0.000892704	-	-	-	-	:
Arthrinium	Y-o-o	4	0.000714163	-	-	-	-	:	R1
Chaetomium	Y-o-o	4	0.000714163	-	-	-	-	:	R1, R2, R4
Stemphylium	Y-o-o	4	0.000714163	-	-	-	-	:	R1
Trichocladium	Y-o-o	4	0.000714163	-	-	-	-	:
Vermispora	Y-o-o	4	0.000714163	-	-	-	-	:
Paraconiothyrium	Y-o-o	3	0.000535622	-	-	-	-	:	R1
Auricularia	Y-o-o	2	0.000357082	-	-	-	-	:
Nectria	Y-o-o	2	0.000357082	-	-	-	-	:	R1
Septoglomus	Y-o-o	2	0.000357082	-	-	-	-	:
Volvopluteus	Y-o-o	2	0.000357082	-	-	-	-	:
Leucosporidiella	Y-o-o	1	0.000178541	-	-	-	-	:
Sterigmatomyces	Y-o-o	1	0.000178541	-	-	-	-	:
Talaromyces	o-Y-Y	-	-	574	0.0836555	6	4.41176	:
Rhizopus	o-Y-Y	-	-	323	0.0470745	4	2.94118	:
Mucor	o-Y-Y	-	-	11	0.00160316	2	1.47059	:
Graphium	o-Y-o	-	-	127	0.0185092	-	-	:
Coprinellus	o-Y-o	-	-	5	0.000728707	-	-	:	R2
Cosmospora	o-Y-o	-	-	5	0.000728707	-	-	:
Monographella	o-Y-o	-	-	5	0.000728707	-	-	:
Sistotrema	o-Y-o	-	-	4	0.000582965	-	-	:
Beauveria	o-Y-o	-	-	3	0.000437224	-	-	:
Phomopsis	o-o-Y	-	-	-	-	6	4.41176	:	R1, R2, R3
Guignardia	o-o-Y	-	-	-	-	1	0.735294	:	R1, R2
Pythium	o-o-Y	-	-	-	-	1	0.735294	:
Rhizomucor	o-o-Y	-	-	-	-	1	0.735294	:
Diaporthe	-	-	-	-	-	-	-	:	R1, R2, R3
Curvularia	-	-	-	-	-	-	-	:	R1, R2, R4
Ampelomyces	-	-	-	-	-	-	-	:	R1, R2
Cercospora	-	-	-	-	-	-	-	:	R1, R2
Leptospora	-	-	-	-	-	-	-	:	R1, R2
Neofusicoccum	-	-	-	-	-	-	-	:	R1, R2
Colletotricum	-	-	-	-	-	-	-	:	R2
Coniothyrium	-	-	-	-	-	-	-	:	R2
Pestalotiopsis	-	-	-	-	-	-	-	:	R2
Peyronellaea	-	-	-	-	-	-	-	:	R2
Saccharicola	-	-	-	-	-	-	-	:	R2
Stagonosporopsis	-	-	-	-	-	-	-	:	R2
Paecilomyces	-	-	-	-	-	-	-	:	R4
Scopulariopsis	-	-	-	-	-	-	-	:	R4
Epicoccum	-	-	-	-	-	-	-	:	R1, R3
Annulohypoxylon	-	-	-	-	-	-	-	:	R1
Didymella	-	-	-	-	-	-	-	:	R1
Eutypella	-	-	-	-	-	-	-	:	R1
Magnaporthe	-	-	-	-	-	-	-	:	R1
Ophiognomonia	-	-	-	-	-	-	-	:	R1
Xylaria	-	-	-	-	-	-	-	:	R1
Davidella	-	-	-	-	-	-	-	:	R3
Phialophora	-	-	-	-	-	-	-	:	R3
Plectosphaerella	-	-	-	-	-	-	-	:	R3

## Sheet: Table S2
Table S2. Endophytic fungal species isolated from healthy soybean roots (CD-iso)
NO.	Sample	Species identified	Culture medium	GenBank ID	Identity(%)
1	JN1b	Fusarium solani	Potato Dextrose Agar	KY091148.1	0.99
2	JN1b	Macrophomina phaseolina	Malt Extract Agar	KT768130.1	1
3	JN1b	Trichoderma erinaceum	Malt Extract Agar	KC884817.1	1
4	JN1b	Fusarium solani	Czapek Dox Medium	KY091148.1	1
5	JN1b	Fusarium flocciferum	Czapek Dox Medium	KC999486.1	0.99
6	JN1b	Talaromyces sp.	Intergrated Potato Medium	KP851981.1	0.99
7	JN1b	Trichoderma asperellum	Malt Extract Agar	KX533999.1	1
8	JN2b	Talaromyces purpurogenus	Potato Dextrose Agar	AB872825.1	0.99
9	JN2b	Pythium myriotylum	Potato Dextrose Agar	KJ162354.1	1
10	JN2b	Alternaria alternata	Potato Dextrose Agar	KY609180.1	0.99
11	JN2b	Macrophomina phaseolina	Potato Dextrose Agar	KU863545.1	1
12	JN2b	Macrophomina phaseolina	Potato Dextrose Agar	KU863545.2	1
13	JN2b	Alternaria alternata	Malt Extract Agar	KY609180.1	0.99
14	JN2b	Rhizopus oryzae	Malt Extract Agar	KT899481.1	1
15	JN2b	Penicillium aurantiogriseum	Czapek Dox Medium	GU566234.1	0.97
16	JN2b	Alternaria sp.	Intergrated Potato Medium	KT269179.1	0.99
17	JN2b	Talaromyces purpurogenus	Intergrated Potato Medium	AB872825.1	1
18	JN2b	Fusarium solani	Intergrated Potato Medium	KU377510.1	1
19	JN2b	Penicillium aurantiogriseum	Czapek Dox Medium	NR_121247.1	1
20	JN1c	Clonostachys rosea	Czapek Dox Medium	KR183785.1	0.99
21	JN1c	Trichoderma asperellum	Intergrated Potato Medium	KY225660.1	0.99
22	JN1c	Fusarium solani	Czapek Dox Medium	JN232141.1	0.92
23	JN1c	Trichoderma virens	Intergrated Potato Medium	KY225679.1	0.99
24	JN1c	Trichoderma erinaceus	Czapek Dox Medium	KT588242.1	0.99
25	JN2c	Alternaria alternata	Potato Dextrose Agar	KJ957793.1	1
26	JN2c	Trichoderma koningii	Potato Dextrose Agar	KY886134.1	0.99
27	JN2c	Trichoderma harzianum	Potato Dextrose Agar	KR856225.1	0.99
28	JN2c	Trichoderma harzianum	Intergrated Potato Medium	KR856225.1	1
29	JN2c	Trichoderma virens	Intergrated Potato Medium	KY225664.1	0.94
30	JN2c	Trichoderma asperellum	Intergrated Potato Medium	KF815050.1	0.99
31	JN1d	Fusarium solani	Malt Extract Agar	KM235740.1	1
32	JN1d	Fusarium solani	Intergrated Potato Medium	KY091148.1	1
33	JN1d	Clonostachys rosea	Intergrated Potato Medium	KR093840.1	0.89
34	JN1d	Fusarium equiseti	Intergrated Potato Medium	KM246255.1	0.98
35	JN1d	Trichoderma asperellum	Potato Dextrose Agar	KF815050.1	0.99
36	JN1d	Macrophomina phaseolina	Potato Dextrose Agar	GU046898.1	1
37	JN1d	Macrophomina phaseolina	Czapek Dox Medium	?KM519656.1	0.97
38	JN1d	Fusarium oxysporum	Intergrated Potato Medium	KY081573.1	1
39	JN1d	Mucor irregularis	Malt Extract Agar	JX976251.1	0.99
40	JN1d	Fusarium oxysporum	Intergrated Potato Medium	KJ699122.1	0.99
41	JN2d	Mucor sp.	Intergrated Potato Medium	HQ608037.1	0.99
42	JN2d	Fusarium solani	Intergrated Potato Medium	KU872821.1	0.99
43	JN2d	Fusarium oxysporum	Intergrated Potato Medium	JN400705.1	0.99
44	JN2d	Trichoderma hamatum	Czapek Dox Medium	KY225629.1	1
45	JN2d	Fusarium solani	Czapek Dox Medium	JQ277276.1	0.99
46	JN2d	Meyerozyma guilliermondii	Czapek Dox Medium	KY104257.1	0.99
47	JN2d	Fusarium solani	Intergrated Potato Medium	KF624788.1	0.99
48	JN2d	Fusarium solani	Czapek Dox Medium	KY091148.1	1
49	JN2d	Rhizopus oryzae	Potato Dextrose Agar	KT899481.1	0.99
50	JN2d	Fusarium falciforme	Intergrated Potato Medium	KF255467.1	1
51	SZ1b	Talaromyces purpurogenus	Potato Dextrose Agar	AB872825.1	0.99
52	SZ1b	Fusarium solani	Potato Dextrose Agar	KM235740.1	1
53	SZ1b	Trichoderma harzianum	Potato Dextrose Agar	KY225617.1	1
54	SZ1b	Talaromyces purpureogenus	Malt Extract Agar	LT558947.1	0.99
55	SZ1b	Fusarium solani	Malt Extract Agar	AB872825.1	1
56	SZ1b	Alternaria sp.	Malt Extract Agar	HQ630996.1	1
57	SZ1b	Fusarium solani	Czapek Dox Medium	KU872821.1	0.99
58	SZ1b	Clonostachys rosea	Czapek Dox Medium	KR183785.1	1
59	SZ1b	Clonostachys rosea	Czapek Dox Medium	KF624774.1	0.99
60	SZ2b	Talaromyces sp.	Potato Dextrose Agar	KR856225.1	0.99
61	SZ2b	Guignardia vaccinii	Malt Extract Agar	AB041244.1	0.99
62	SZ2b	Trichoderma harzianum	Czapek Dox Medium	KR856225.1	0.99
63	SZ2b	Fusarium solani	Czapek Dox Medium	KU872821.1	1
64	SZ2b	Fusarium solani	Czapek Dox Medium	KM235740.1	0.99
65	SZ2b	Simplicillium lamellicola	Intergrated Potato Medium	AB214656.1	0.98
66	SZ1c	Meyerozyma guilliermondii	Potato Dextrose Agar	KY104257.1	0.99
67	SZ1c	Trichoderma asperellum	Potato Dextrose Agar	KT302162.1	0.99
68	SZ1c	Fusarium falciforme	Czapek Dox Medium	KF255467.1	1
69	SZ1c	Clonostachys rosea	Czapek Dox Medium	KY810798.1	0.99
70	SZ1c	Rhizopus oryzae	Malt Extract Agar	KT899481.1	0.99
71	SZ1c	Fusarium solani	Malt Extract Agar	KF624788.1	1
72	SZ1c	Penicillium oxalicum	Malt Extract Agar	KM458819.1	0.99
73	SZ1c	Colletotrichum gloeosporioides	Malt Extract Agar	HQ718504.1	0.94
74	SZ1c	Penicillium polonicum	Intergrated Potato Medium	GU566208.1	0.99
75	SZ1c	Trichoderma harzianum	Intergrated Potato Medium	KR856225.1	0.99
76	SZ1c	Fusarium solani	Intergrated Potato Medium	KF624788.1	0.99
77	SZ1c	Fusarium solani	Intergrated Potato Medium	KF624788.1	0.99
78	SZ2c	Trichoderma harzianum	Potato Dextrose Agar	KR856225.1	1
79	SZ2c	Fusarium proliferatum	Potato Dextrose Agar	JX241655.1	1
80	SZ2c	Trichoderma asperellum	Potato Dextrose Agar	KT302162.1	0.99
81	SZ2c	Fusarium solani	Czapek Dox Medium	KY091148.1	1
82	SZ2c	Fusarium solani	Czapek Dox Medium	JQ625577.1	0.97
83	SZ2c	Trichoderma harzianum	Malt Extract Agar	KM491893.1	1
84	SZ2c	Aspergillus flavus	Intergrated Potato Medium	KR076753.1	0.99
85	SZ1d	Phomopsis longicolla	Czapek Dox Medium	AY857868.1	1
86	SZ1d	Fusarium solani	Czapek Dox Medium	KY091148.1	1
87	SZ1d	Phomopsis longicolla	Potato Dextrose Agar	AY857868.1	1
88	SZ1d	Phomopsis longicolla	Intergrated Potato Medium	AY857868.1	1
89	SZ1d	Phomopsis longicolla	Malt Extract Agar	AY857868.2	1
90	SZ2d	Fusarium solani	Czapek Dox Medium	HQ731056.1	1
91	SZ2d	Fusarium solani	Malt Extract Agar	HQ731056.1	0.99
92	SZ2d	Fusarium solani	Malt Extract Agar	KY091148.1	1
93	SZ2d	Fusarium solani	Intergrated Potato Medium	KF624788.1	0.99
94	XZ1b	Trichoderma asperellum	Intergrated Potato Medium	KR856222.1	1
95	XZ1b	Meyerozyma guilliermondii	Intergrated Potato Medium	KF293846.1	0.97
96	XZ1b	Fusarium equiseti	Intergrated Potato Medium	KM246255.1	0.99
97	XZ1b	Fusarium solani	Malt Extract Agar	KY484958.2	1
98	XZ1b	Acremonium cellulolyticus	Malt Extract Agar	AB474749.2	1
99	XZ2b	Fusarium solani	Intergrated Potato Medium	KY091148.1	0.99
100	XZ2b	Fusarium cf. incarnatum	Intergrated Potato Medium	KR527138.1	0.99
101	XZ2b	Aspergillus flavus	Intergrated Potato Medium	KX011593.1	1
102	XZ2b	Fusarium solani	Czapek Dox Medium	KF572442.1	1
103	XZ2b	Fusarium oxysporum	Potato Dextrose Agar	JF957818.1	0.99
104	XZ1c	Rhizomucor variabilis	Potato Dextrose Agar	HM623314.1	0.99
105	XZ1c	Fusarium solani	Potato Dextrose Agar	KU872821.1	0.99
106	XZ1c	Aspergillus niger	Potato Dextrose Agar	JF439461.1	0.99
107	XZ1c	Rhizoctonia sp.	Czapek Dox Medium	JF519837.1	1
108	XZ1c	Aspergillus niger	Czapek Dox Medium	JF439461.1	1
109	XZ1c	Trichoderma asperellum	Malt Extract Agar	KR856222.1	0.99
110	XZ1c	Calonectria curvispora	Potato Dextrose Agar	GQ280568.1	0.99
111	XZ2c	Rhizopus oryzae	Intergrated Potato Medium	KT899481.1	0.99
112	XZ2c	Calonectria curvispora	Intergrated Potato Medium	GQ280568.1	0.99
113	XZ2c	Trichoderma asperellum	Intergrated Potato Medium	KU896374.1	0.99
114	XZ2c	Trichoderma harzianum	Intergrated Potato Medium	KC139307.1	0.99
115	XZ2c	Fusarium solani	Czapek Dox Medium	KF624788.1	0.99
116	XZ2c	Calonectria curvispora	Czapek Dox Medium	GQ280568.1	0.99
117	XZ2c	Fusarium solani	Malt Extract Agar	HE647939.1	0.99
118	XZ1d	Rhizoctonia solani	Potato Dextrose Agar	JQ946295.1	0.99
119	XZ1d	Fusarium solani	Malt Extract Agar	KF624788.1	1
120	XZ1d	Fusarium solani	Malt Extract Agar	KM235740.1	0.99
121	XZ1d	Rhizoctonia solani	Czapek Dox Medium	FJ746967.1	1
122	XZ1d	Phomopsis longicolla	Czapek Dox Medium	AY857868.1	1
123	XZ1d	Fusarium solani	Czapek Dox Medium	KP267318.1	0.99
124	XZ1d	Fusarium solani	Intergrated Potato Medium	KM235740.1	0.99
125	XZ2d	Fusarium solani	Intergrated Potato Medium	HE647947.1	0.94
126	XZ2d	Fusarium solani	Intergrated Potato Medium	HE647936.1	0.99
127	XZ2d	Penicillium oxalicum	Malt Extract Agar	KF152942.1	0.99
128	XZ2d	Phomopsis longicolla	Malt Extract Agar	AY857868.1	1
129	XZ2d	Macrophomina phaseolina	Czapek Dox Medium	KU863545.1	1
130	XZ2d	Fusarium solani	Potato Dextrose Agar	KY091148.1	0.99
131	XZ2d	Fusarium solani	Potato Dextrose Agar	KF624788.1	0.99
132	XZ2d	Fusarium solani	Potato Dextrose Agar	KM235740.1	1
133	XZ2d	Fusarium solani	Potato Dextrose Agar	KU872821.1	0.99
134	XZ2d	Fusarium solani	Malt Extract Agar	HQ607968.1	0.99
135	XZ2d	Fusarium solani	Intergrated Potato Medium	KM235740.1	1
136	XZ2d	Rhizoctonia solani	Intergrated Potato Medium	FJ746968.1	0.99

## Sheet: Table S3
Table S3. Fungal genera identified from different cities
Data with yellow background are shown in Fig. 2D.
Genus name	Group	JN (OTU abundance)	JN (%)	SZ (OTU abundance)	SZ (%)	XZ (OTU abundance)	XZ (%)	Total (OTU abundance)	Total (%)
Fusarium (Haematonectria, Gibberella)	Y-Y-Y	103727	60.4054	153799	71.5657	90841	52.3664	348367	62.1977
Rhizoctonia (Ceratobasidium)	Y-Y-Y	18334	10.6768	5081	2.36429	42237	24.348	65652	11.7216
Phoma	Y-Y-Y	19378	11.2848	21539	10.0225	286	0.164868	41203	7.35642
Clonostachys	Y-Y-Y	2563	1.49256	13590	6.3237	16339	9.41881	32492	5.80115
Macrophomina	Y-Y-Y	616	0.358728	11785	5.48379	3584	2.06604	15985	2.85398
Mortierella	Y-Y-Y	12763	7.43253	490	0.228007	683	0.393723	13936	2.48814
Calonectria	Y-Y-Y	668	0.38901	16	0.00744512	12433	7.16715	13117	2.34192
Ilyonectria	Y-Y-Y	8623	5.02161	27	0.0125636	550	0.317054	9200	1.64258
Alternaria	Y-Y-Y	930	0.541586	990	0.460667	66	0.0380465	1986	0.354582
Podospora	Y-Y-Y	333	0.193923	1594	0.74172	47	0.0270937	1974	0.35244
Cercophora	Y-Y-Y	7	0.00407645	1374	0.639349	507	0.292266	1888	0.337085
Engyodontium	Y-Y-Y	434	0.25274	173	0.0805003	990	0.570697	1597	0.28513
Preussia	Y-Y-Y	12	0.0069882	765	0.35597	778	0.448487	1555	0.277631
Corynespora	Y-Y-Y	349	0.20324	774	0.360157	175	0.100881	1298	0.231746
Glomus	Y-Y-Y	2	0.0011647	391	0.18194	446	0.257102	839	0.149796
Cladosporium	Y-Y-Y	346	0.201493	101	0.0469973	289	0.166597	736	0.131406
Zopfiella	Y-Y-Y	623	0.362804	20	0.00930639	24	0.0138351	667	0.119087
Microdochium	Y-Y-Y	41	0.0238764	125	0.058165	419	0.241538	585	0.104446
Acremonium	Y-Y-Y	28	0.0163058	11	0.00511852	529	0.304948	568	0.101411
Cochliobolus	Y-Y-Y	175	0.101911	248	0.115399	118	0.0680225	541	0.0965906
Psathyrella	Y-Y-Y	20	0.011647	44	0.0204741	407	0.23462	471	0.0840927
Dokmaia	Y-Y-Y	3	0.00174705	55	0.0255926	216	0.124516	274	0.0489202
Thanatephorus	Y-Y-Y	4	0.0023294	17	0.00791044	210	0.121057	231	0.0412429
Trichoderma	Y-Y-Y	121	0.0704644	86	0.0400175	13	0.007494	220	0.039279
Exophiala	Y-Y-Y	72	0.0419292	112	0.0521158	3	0.00172939	187	0.0333871
Schizothecium	Y-Y-Y	5	0.00291175	171	0.0795697	7	0.00403523	183	0.032673
Meyerozyma	Y-Y-Y	25	0.0145588	37	0.0172168	102	0.0587991	164	0.0292807
Humicola	Y-Y-Y	108	0.0628938	11	0.00511852	38	0.0219056	157	0.0280309
Coprinopsis	Y-Y-Y	22	0.0128117	17	0.00791044	118	0.0680225	157	0.0280309
Colletotrichum	Y-Y-Y	148	0.0861878	3	0.00139596	5	0.00288231	156	0.0278524
Cladorrhinum	Y-Y-Y	7	0.00407645	1	0.00046532	131	0.0755165	139	0.0248172
Myrothecium	Y-Y-Y	33	0.0192176	57	0.0265232	35	0.0201762	125	0.0223176
Guehomyces	Y-Y-Y	92	0.0535762	1	0.00046532	7	0.00403523	100	0.0178541
Rhodotorula	Y-Y-Y	18	0.0104823	17	0.00791044	56	0.0322819	91	0.0162472
Candida	Y-Y-Y	43	0.0250411	11	0.00511852	29	0.0167174	83	0.0148189
Leptosphaeria	Y-Y-Y	55	0.0320293	22	0.010237	4	0.00230585	81	0.0144618
Cryptococcus	Y-Y-Y	63	0.0366881	1	0.00046532	10	0.00576462	74	0.013212
Neurospora	Y-Y-Y	14	0.0081529	1	0.00046532	57	0.0328583	72	0.0128549
Aspergillus	Y-Y-Y	43	0.0250411	6	0.00279192	20	0.0115292	69	0.0123193
Paraphoma	Y-Y-Y	1	0.00058235	17	0.00791044	41	0.0236349	59	0.0105339
Emericella	Y-Y-Y	21	0.0122294	25	0.011633	2	0.00115292	48	0.00856996
Panaeolus	Y-Y-Y	28	0.0163058	2	0.000930639	16	0.00922339	46	0.00821288
Rhodosporidium	Y-Y-Y	9	0.00524115	10	0.0046532	18	0.0103763	37	0.00660601
Penicillium	Y-Y-Y	17	0.00989995	13	0.00604916	4	0.00230585	34	0.00607039
Davidiella	Y-Y-Y	19	0.0110647	3	0.00139596	7	0.00403523	29	0.00517768
Stachybotrys	Y-Y-Y	1	0.00058235	7	0.00325724	18	0.0103763	26	0.00464206
Tetracladium	Y-Y-Y	4	0.0023294	19	0.00884107	2	0.00115292	25	0.00446352
Simplicillium	Y-Y-Y	18	0.0104823	2	0.000930639	2	0.00115292	22	0.0039279
Nigrospora	Y-Y-Y	5	0.00291175	8	0.00372256	6	0.00345877	19	0.00339228
Pseudaleuria	Y-Y-Y	9	0.00524115	1	0.00046532	1	0.000576462	11	0.00196395
Periconia	Y-Y-Y	2	0.0011647	2	0.000930639	6	0.00345877	10	0.00178541
Trichocladium	Y-Y-Y	2	0.0011647	1	0.00046532	1	0.000576462	4	0.000714163
Myrmecridium	Y-Y-o	72	0.0419292	29	0.0134943	-	-	101	0.0180326
Codinaeopsis	Y-Y-o	21	0.0122294	1	0.00046532	-	-	22	0.0039279
Trametes	Y-Y-o	14	0.0081529	7	0.00325724	-	-	21	0.00374936
Phaeosphaeria	Y-Y-o	14	0.0081529	6	0.00279192	-	-	20	0.00357082
Mrakia	Y-Y-o	9	0.00524115	1	0.00046532	-	-	10	0.00178541
Verticillium	Y-Y-o	8	0.0046588	2	0.000930639	-	-	10	0.00178541
Phaeoacremonium	Y-Y-o	5	0.00291175	24	0.0111677	-	-	29	0.00517768
Phaeosphaeriopsis	Y-Y-o	4	0.0023294	38	0.0176821	-	-	42	0.00749871
Erythrobasidium	Y-Y-o	4	0.0023294	32	0.0148902	-	-	36	0.00642747
Sarocladium	Y-Y-o	2	0.0011647	15	0.0069798	-	-	17	0.00303519
Crinipellis	Y-Y-o	1	0.00058235	18	0.00837575	-	-	19	0.00339228
Fusicolla	Y-o-Y	229	0.133358	-	-	1	0.000576462	230	0.0410644
Metacordyceps	Y-o-Y	217	0.12637	-	-	104	0.059952	321	0.0573116
Bjerkandera	Y-o-Y	33	0.0192176	-	-	15	0.00864693	48	0.00856996
Minimedusa	Y-o-Y	4	0.0023294	-	-	3	0.00172939	7	0.00124979
Chaetomium	Y-o-Y	2	0.0011647	-	-	2	0.00115292	4	0.000714163
Mycoleptodiscus	Y-o-Y	1	0.00058235	-	-	263	0.151609	264	0.0471348
Cladophialophora	Y-o-o	37	0.021547	-	-	-	-	37	0.00660601
Leptosphaerulina	Y-o-o	20	0.011647	-	-	-	-	20	0.00357082
Apodus	Y-o-o	9	0.00524115	-	-	-	-	9	0.00160687
Cyphellophora	Y-o-o	9	0.00524115	-	-	-	-	9	0.00160687
Filobasidium	Y-o-o	6	0.0034941	-	-	-	-	6	0.00107124
Peziza	Y-o-o	6	0.0034941	-	-	-	-	6	0.00107124
Rhizophlyctis	Y-o-o	6	0.0034941	-	-	-	-	6	0.00107124
Leucosporidiella	Y-o-o	1	0.00058235	-	-	-	-	1	0.000178541
Psilocybe	o-Y-Y	-	-	854	0.397383	26	0.014988	880	0.157116
Scytalidium	o-Y-Y	-	-	29	0.0134943	5	0.00288231	34	0.00607039
Drechslera	o-Y-Y	-	-	14	0.00651448	1	0.000576462	15	0.00267811
Volutella	o-Y-Y	-	-	13	0.00604916	4	0.00230585	17	0.00303519
Exserohilum	o-Y-Y	-	-	9	0.00418788	1	0.000576462	10	0.00178541
Piriformospora	o-Y-Y	-	-	1	0.00046532	5	0.00288231	6	0.00107124
Pyrenochaetopsis	o-Y-o	-	-	41	0.0190781	-	-	41	0.00732017
Torula	o-Y-o	-	-	33	0.0153556	-	-	33	0.00589185
Coniochaeta	o-Y-o	-	-	18	0.00837575	-	-	18	0.00321373
Chaetosphaeronema	o-Y-o	-	-	13	0.00604916	-	-	13	0.00232103
Drechslerella	o-Y-o	-	-	11	0.00511852	-	-	11	0.00196395
Arthrobotrys	o-Y-o	-	-	7	0.00325724	-	-	7	0.00124979
Chloridium	o-Y-o	-	-	5	0.0023266	-	-	5	0.000892704
Devriesia	o-Y-o	-	-	5	0.0023266	-	-	5	0.000892704
Vermispora	o-Y-o	-	-	4	0.00186128	-	-	4	0.000714163
Auricularia	o-Y-o	-	-	2	0.000930639	-	-	2	0.000357082
Sterigmatomyces	o-Y-o	-	-	1	0.00046532	-	-	1	0.000178541
Sporobolomyces	o-o-Y	-	-	-	-	35	0.0201762	35	0.00624893
Capnobotryella	o-o-Y	-	-	-	-	30	0.0172939	30	0.00535622
Thelonectria	o-o-Y	-	-	-	-	14	0.00807047	14	0.00249957
Waitea	o-o-Y	-	-	-	-	7	0.00403523	7	0.00124979
Entoloma	o-o-Y	-	-	-	-	6	0.00345877	6	0.00107124
Arthrinium	o-o-Y	-	-	-	-	4	0.00230585	4	0.000714163
Stemphylium	o-o-Y	-	-	-	-	4	0.00230585	4	0.000714163
Paraconiothyrium	o-o-Y	-	-	-	-	3	0.00172939	3	0.000535622
Nectria	o-o-Y	-	-	-	-	2	0.00115292	2	0.000357082
Septoglomus	o-o-Y	-	-	-	-	2	0.00115292	2	0.000357082
Volvopluteus	o-o-Y	-	-	-	-	2	0.00115292	2	0.000357082

## Sheet: Table S4
Table S4. Fungal genera identified from different tissues (roots and seeds)
Data with yellow background are shown in Fig. 3D.
Genus name	Group	Root (OTU abundance)	Root (%)	Seed (OTU abundance)	Seed (%)	note
Fusarium (Haematonectria, Gibberella)	Y-Y	348367	62.1977	1551	5.47322	Root>Seed
Rhizoctonia (Ceratobasidium)	Y-Y	65652	11.7216	3	0.0105865	Root>Seed
Phoma	Y-Y	41203	7.35642	2	0.00705766	Root>Seed
Clonostachys	Y-Y	32492	5.80115	334	1.17863	Root>Seed
Mortierella	Y-Y	13936	2.48814	4	0.0141153	Root>Seed
Calonectria	Y-Y	13117	2.34192	267	0.942198	Root>Seed
Cladosporium	Y-Y	736	0.131406	8830	31.1596	Seed>Root
Alternaria	Y-Y	1986	0.354582	5680	20.0438	Seed>Root
Engyodontium	Y-Y	1597	0.28513	5669	20.0049	Seed>Root
Guehomyces	Y-Y	100	0.0178541	1776	6.2672	Seed>Root
Nigrospora	Y-Y	19	0.00339228	1151	4.06168	Seed>Root
Aspergillus	Y-Y	69	0.0123193	412	1.45388	Seed>Root
Emericella	Y-Y	48	0.00856996	310	1.09394
Leptosphaeria	Y-Y	81	0.0144618	288	1.0163
Rhodotorula	Y-Y	91	0.0162472	272	0.959842
Penicillium	Y-Y	34	0.00607039	177	0.624603
Trichoderma	Y-Y	220	0.039279	160	0.564613
Mrakia	Y-Y	10	0.00178541	113	0.398758
Auricularia	Y-Y	2	0.000357082	111	0.3917
Candida	Y-Y	83	0.0148189	69	0.243489
Erythrobasidium	Y-Y	36	0.00642747	62	0.218787
Cryptococcus	Y-Y	74	0.013212	44	0.155269
Sterigmatomyces	Y-Y	1	0.000178541	40	0.141153
Sporobolomyces	Y-Y	35	0.00624893	36	0.127038
Periconia	Y-Y	10	0.00178541	30	0.105865
Simplicillium	Y-Y	22	0.0039279	16	0.0564613
Meyerozyma	Y-Y	164	0.0292807	8	0.0282306
Paraconiothyrium	Y-Y	3	0.000535622	6	0.021173
Davidiella	Y-Y	29	0.00517768	5	0.0176442
Neurospora	Y-Y	72	0.0128549	4	0.0141153
Thanatephorus	Y-Y	231	0.0412429	2	0.00705766
Schizothecium	Y-Y	183	0.032673	2	0.00705766
Leptosphaerulina	Y-Y	20	0.00357082	2	0.00705766
Leucosporidiella	Y-Y	1	0.000178541	2	0.00705766
Microdochium	Y-Y	585	0.104446	1	0.00352883
Dokmaia	Y-Y	274	0.0489202	1	0.00352883
Stachybotrys	Y-Y	26	0.00464206	1	0.00352883
Volvopluteus	Y-Y	2	0.000357082	1	0.00352883
Macrophomina	Y-o	15985	2.85398	-	-	Root>Seed
Ilyonectria	Y-o	9200	1.64258	-	-	Root>Seed
Podospora	Y-o	1974	0.35244	-	-
Cercophora	Y-o	1888	0.337085	-	-
Preussia	Y-o	1555	0.277631	-	-
Corynespora	Y-o	1298	0.231746	-	-
Psilocybe	Y-o	880	0.157116	-	-
Glomus	Y-o	839	0.149796	-	-
Zopfiella	Y-o	667	0.119087	-	-
Acremonium	Y-o	568	0.101411	-	-
Cochliobolus	Y-o	541	0.0965906	-	-
Psathyrella	Y-o	471	0.0840927	-	-
Metacordyceps	Y-o	321	0.0573116	-	-
Mycoleptodiscus	Y-o	264	0.0471348	-	-
Fusicolla	Y-o	230	0.0410644	-	-
Exophiala	Y-o	187	0.0333871	-	-
Coprinopsis	Y-o	157	0.0280309	-	-
Humicola	Y-o	157	0.0280309	-	-
Colletotrichum	Y-o	156	0.0278524	-	-
Cladorrhinum	Y-o	139	0.0248172	-	-
Myrothecium	Y-o	125	0.0223176	-	-
Myrmecridium	Y-o	101	0.0180326	-	-
Paraphoma	Y-o	59	0.0105339	-	-
Bjerkandera	Y-o	48	0.00856996	-	-
Panaeolus	Y-o	46	0.00821288	-	-
Phaeosphaeriopsis	Y-o	42	0.00749871	-	-
Pyrenochaetopsis	Y-o	41	0.00732017	-	-
Cladophialophora	Y-o	37	0.00660601	-	-
Rhodosporidium	Y-o	37	0.00660601	-	-
Scytalidium	Y-o	34	0.00607039	-	-
Torula	Y-o	33	0.00589185	-	-
Capnobotryella	Y-o	30	0.00535622	-	-
Phaeoacremonium	Y-o	29	0.00517768	-	-
Tetracladium	Y-o	25	0.00446352	-	-
Codinaeopsis	Y-o	22	0.0039279	-	-
Trametes	Y-o	21	0.00374936	-	-
Phaeosphaeria	Y-o	20	0.00357082	-	-
Crinipellis	Y-o	19	0.00339228	-	-
Coniochaeta	Y-o	18	0.00321373	-	-
Sarocladium	Y-o	17	0.00303519	-	-
Volutella	Y-o	17	0.00303519	-	-
Drechslera	Y-o	15	0.00267811	-	-
Thelonectria	Y-o	14	0.00249957	-	-
Chaetosphaeronema	Y-o	13	0.00232103	-	-
Drechslerella	Y-o	11	0.00196395	-	-
Pseudaleuria	Y-o	11	0.00196395	-	-
Exserohilum	Y-o	10	0.00178541	-	-
Verticillium	Y-o	10	0.00178541	-	-
Apodus	Y-o	9	0.00160687	-	-
Cyphellophora	Y-o	9	0.00160687	-	-
Arthrobotrys	Y-o	7	0.00124979	-	-
Minimedusa	Y-o	7	0.00124979	-	-
Waitea	Y-o	7	0.00124979	-	-
Entoloma	Y-o	6	0.00107124	-	-
Filobasidium	Y-o	6	0.00107124	-	-
Peziza	Y-o	6	0.00107124	-	-
Piriformospora	Y-o	6	0.00107124	-	-
Rhizophlyctis	Y-o	6	0.00107124	-	-
Chloridium	Y-o	5	0.000892704	-	-
Devriesia	Y-o	5	0.000892704	-	-
Arthrinium	Y-o	4	0.000714163	-	-
Chaetomium	Y-o	4	0.000714163	-	-
Stemphylium	Y-o	4	0.000714163	-	-
Trichocladium	Y-o	4	0.000714163	-	-
Vermispora	Y-o	4	0.000714163	-	-
Nectria	Y-o	2	0.000357082	-	-
Septoglomus	Y-o	2	0.000357082	-	-
Mycosphaerella	o-Y	-	-	193	0.681064
Ophiosphaerella	o-Y	-	-	168	0.592844
Sporidiobolus	o-Y	-	-	156	0.550498
Phaeoseptoria	o-Y	-	-	136	0.479921
Rigidoporus	o-Y	-	-	118	0.416402
Irpex	o-Y	-	-	83	0.292893
Leptospora	o-Y	-	-	13	0.0458748
Curvularia	o-Y	-	-	12	0.042346
Trichosporon	o-Y	-	-	8	0.0282306
Perenniporia	o-Y	-	-	6	0.021173
Epicoccum	o-Y	-	-	3	0.0105865
